# Supplementary material for: Beta-Carotene Affects the Effects of Heme Oxygenase-1 in Isolated, Ischemic/Reperfused Rat Hearts: Potential Role of the Iron
Source: MDPI journal article supplement (doi:10.3390/molecules27093039), 2022-05-09
Supplement: s1 [file s1]

Supplementary

Figure S1: Original Western blots.

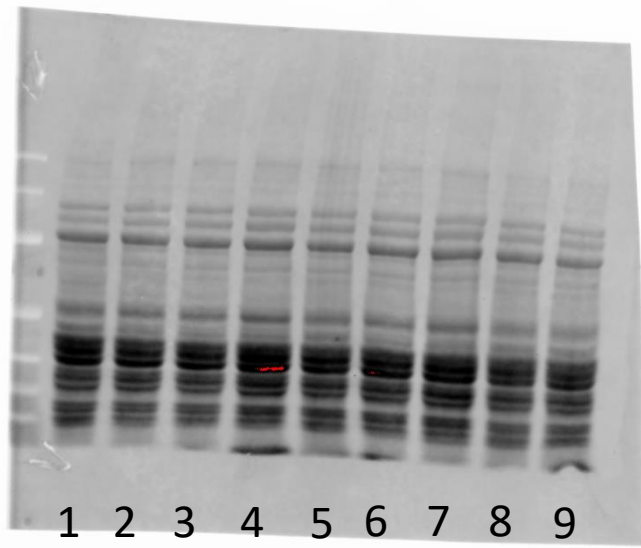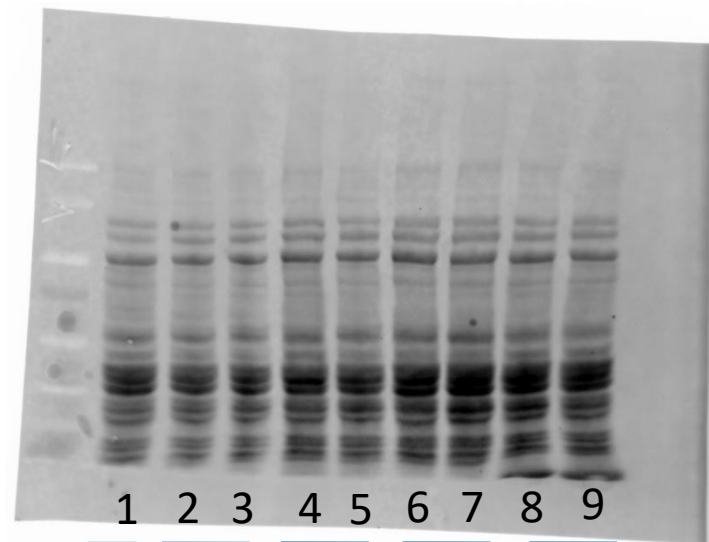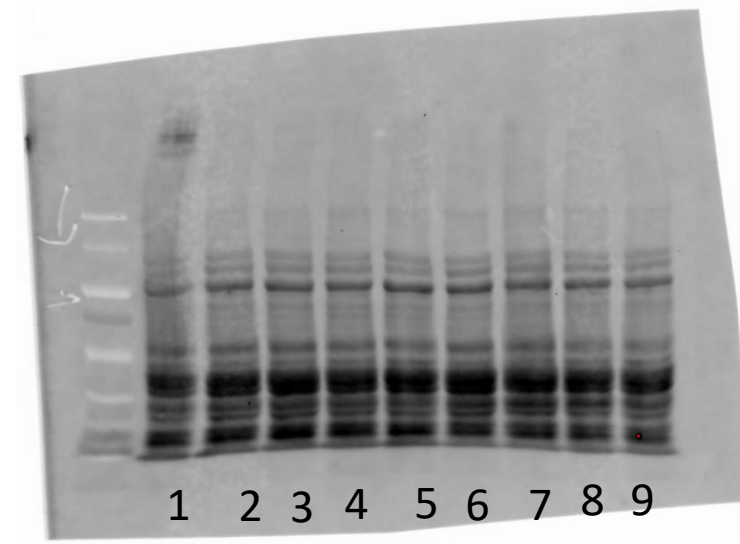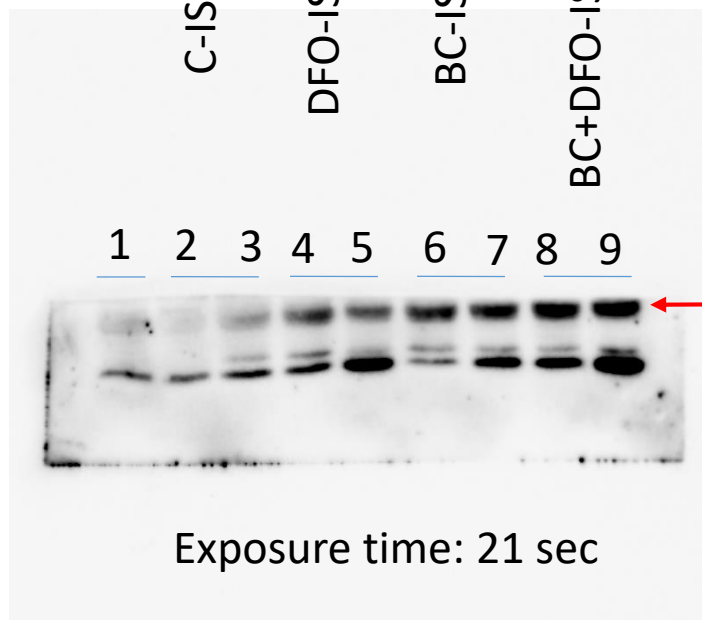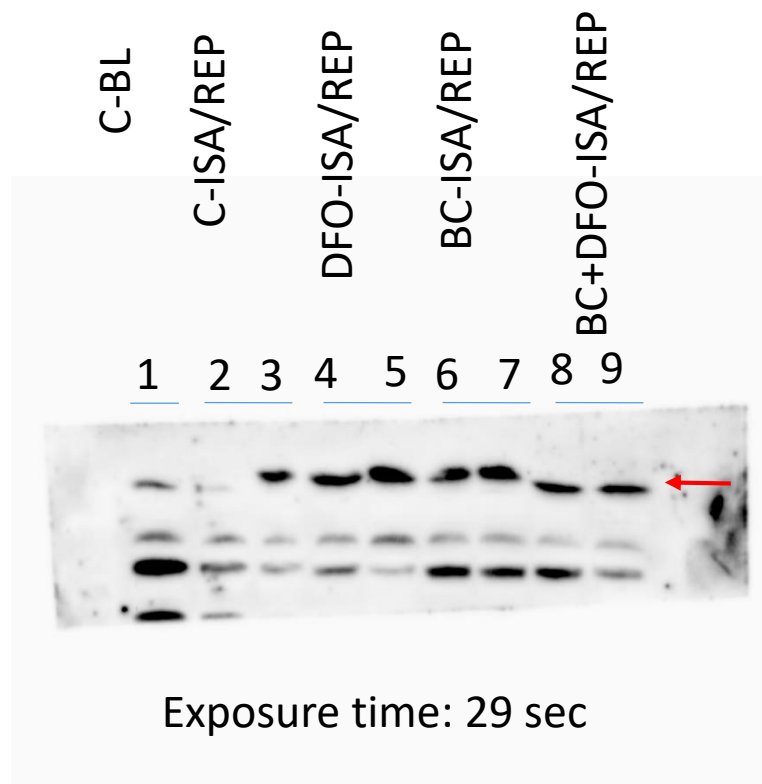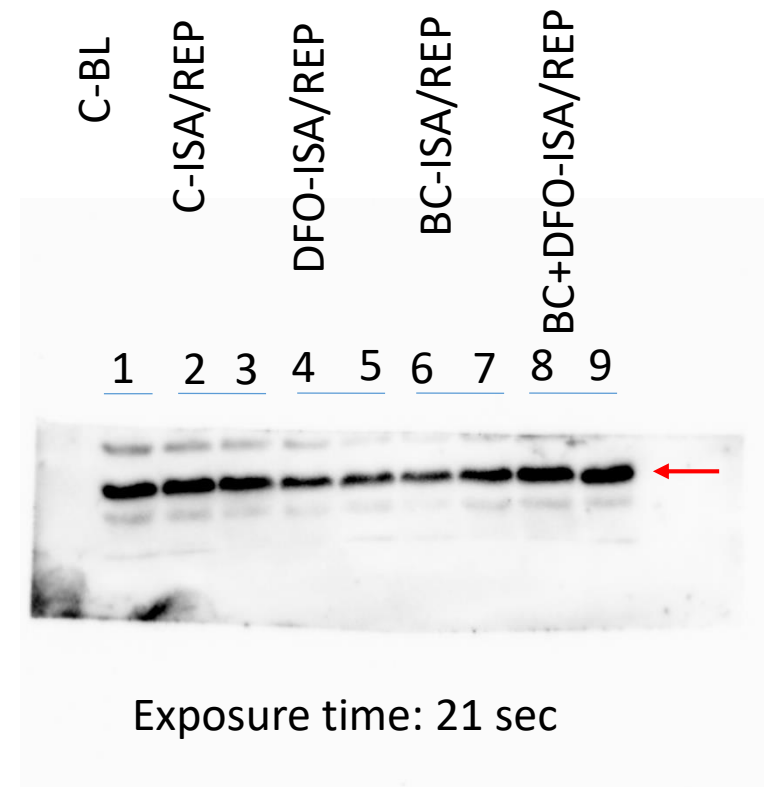

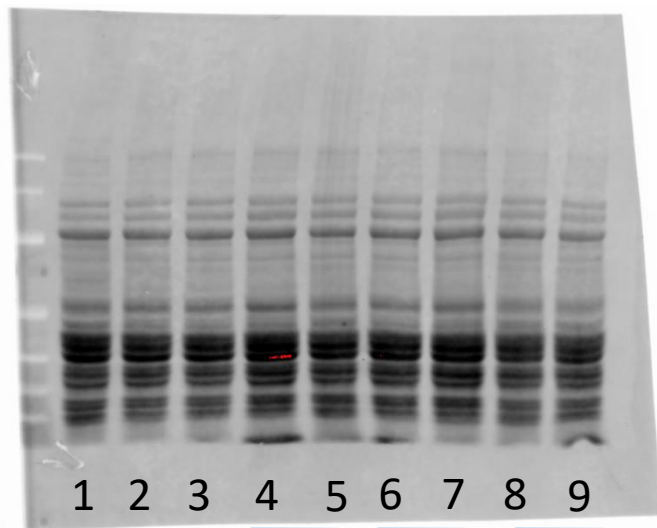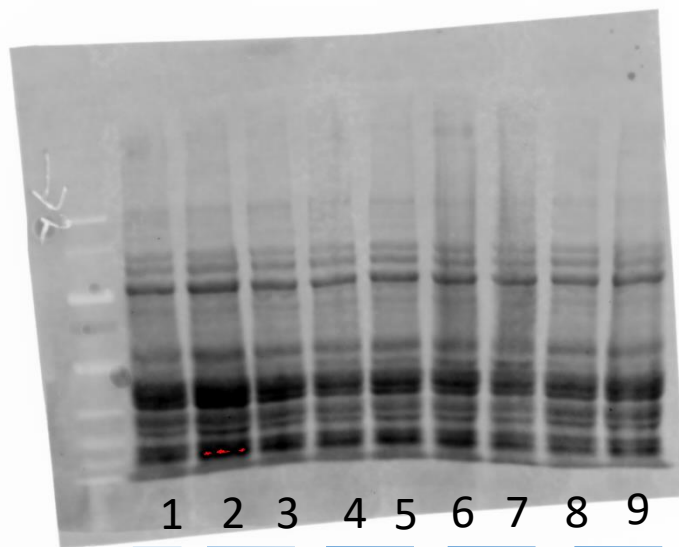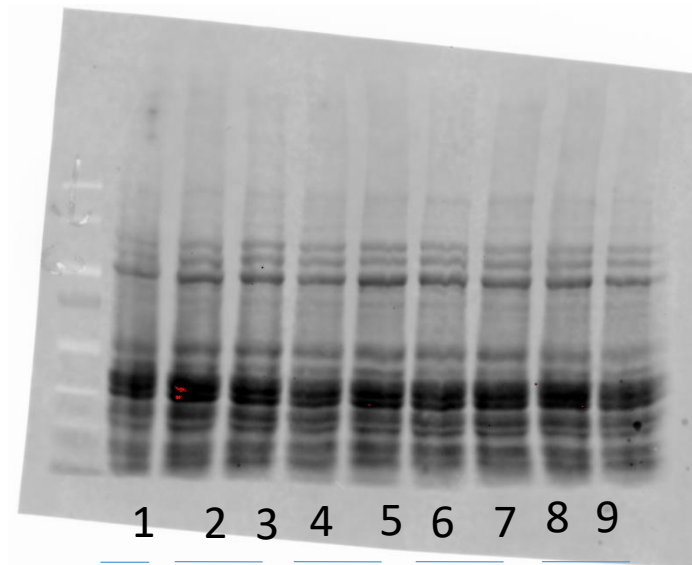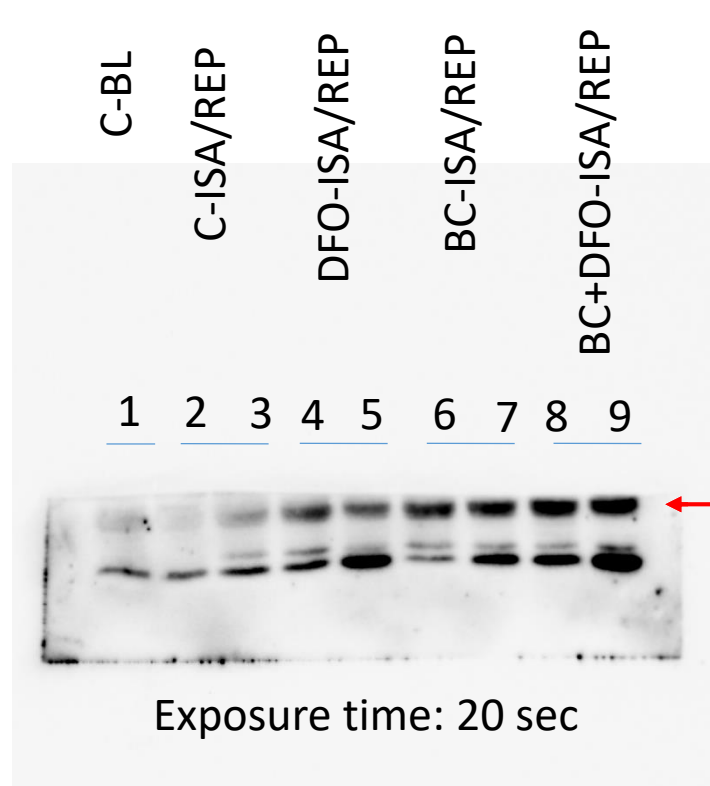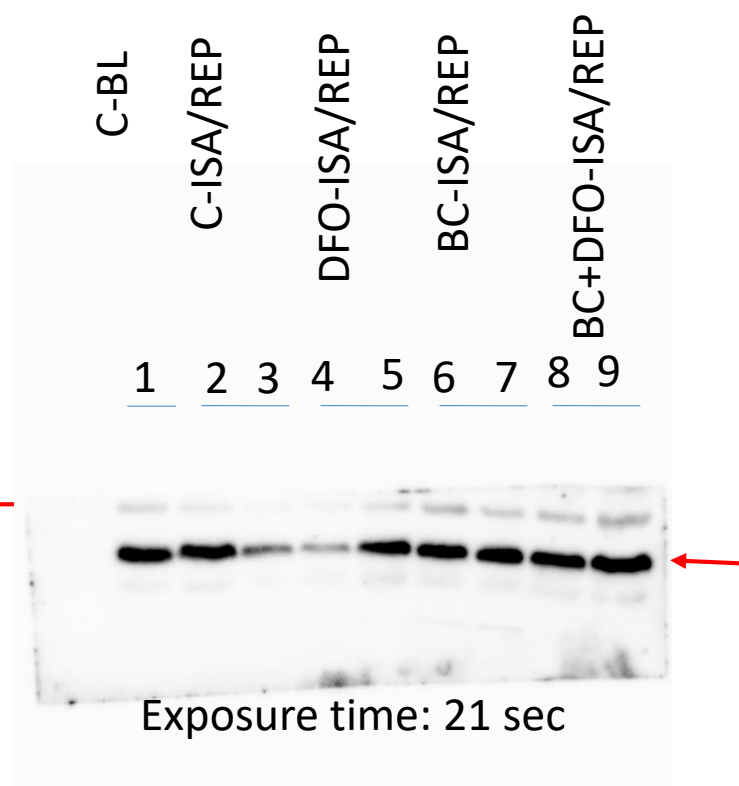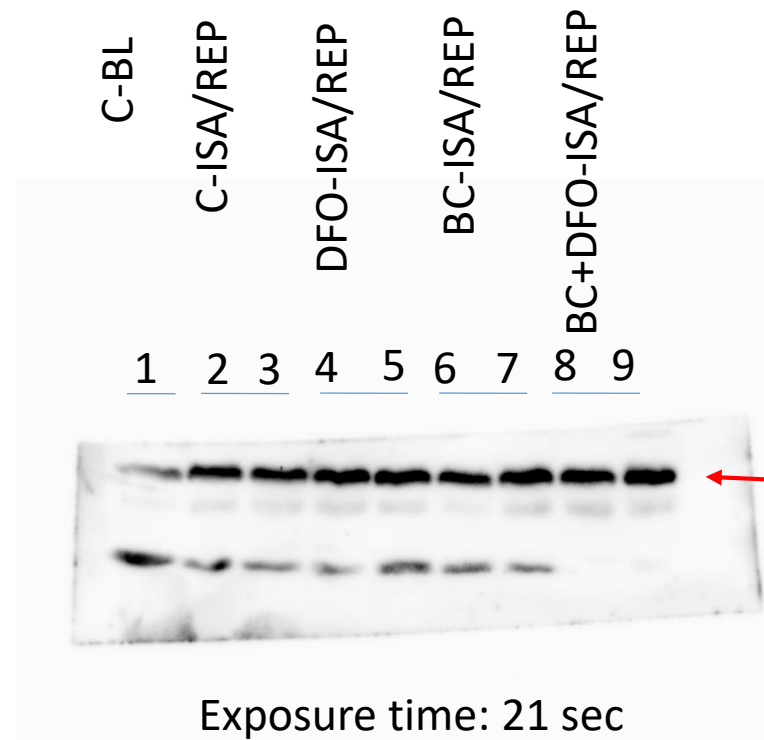

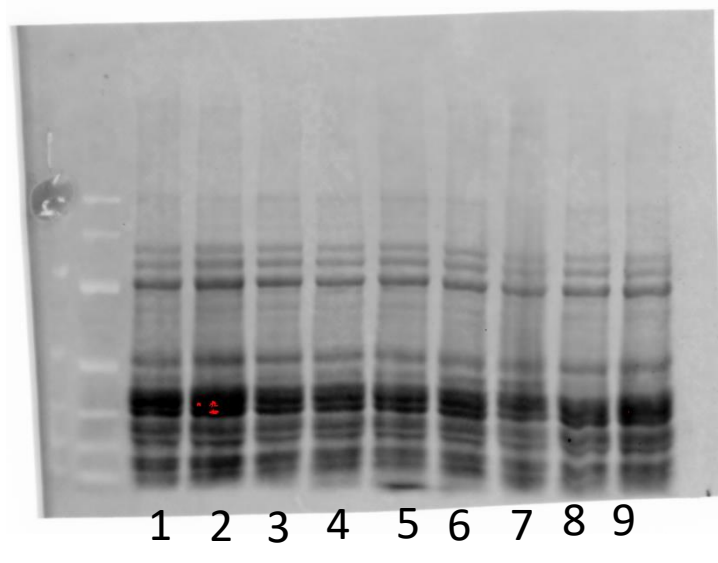

C-BL

C-ISA/REP

DFO-ISA/REP

BC-ISA/REP

BC+DFO-ISA/REP

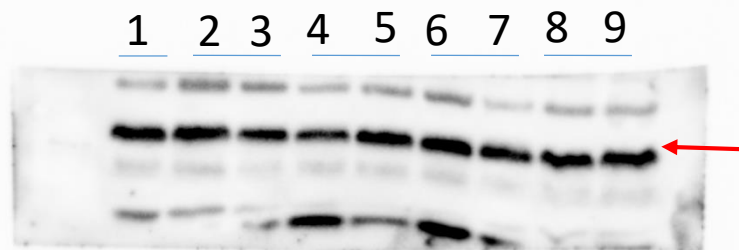

Exposure time: 23 sec
